# Supplementary material for: Analysis of degradation products of Novichok agents in human urine by hydrophilic interaction liquid chromatography–tandem mass spectrometry
Source: Springer Nature journal article supplement (doi:10.1007/s11419-022-00656-4), 2022-12-31
Supplement: MOESM1 [file 23869060]

# Supporting Information

## 1. Investigation of the HILIC-MS/MS conditions

### 1-1. HILIC-MS/MS analysis of standard samples of Novichok degradation products

Table S1. Selected fragment ions and tolerance of the ratio of those fragment ions

|                                  | MOPAA | EOPAA | MPAA | MOPGA | EOPGA | MPGA |
|----------------------------------|-------|-------|------|-------|-------|------|
| Fragment ion 1 ( <i>m/z</i> )    | 136   | 150   | 120  | 99    | 99    | 99   |
| Fragment ion 2 ( <i>m/z</i> )    | 74    | 74    | 74   | 193   | 207   | 74   |
| Relative intensity (ion 1/ion 2) | 77%   | 84%   | 55%  | 59%   | 67%   | 100% |
| Tolerance                        | ±20%  | ±20%  | ±20% | ±20%  | ±20%  | ±20% |

### 1-2. Retention time variation

Table S2. Intra- and inter-day variation of retention times (min, *n* = 6)

|                 | MOPAA       | EOPAA       | MPAA         | MOPGA       | EOPGA       | MPGA         |
|-----------------|-------------|-------------|--------------|-------------|-------------|--------------|
| Intra-day       | 6.72 ± 0.01 | 5.52 ± 0.01 | 11.05 ± 0.01 | 6.04 ± 0.01 | 4.97 ± 0.01 | 10.32 ± 0.01 |
| Within a week   | 6.66 ± 0.04 | 5.48 ± 0.04 | 10.99 ± 0.05 | 5.99 ± 0.04 | 4.92 ± 0.04 | 10.25 ± 0.06 |
| Within 4 months | 6.88 ± 0.15 | 5.65 ± 0.12 | 11.32 ± 0.27 | 6.22 ± 0.16 | 5.11 ± 0.13 | 10.64 ± 0.30 |

## 2. Investigation of the pretreatment methods of biological samples

### 2-1. Optimization of the pretreatment method

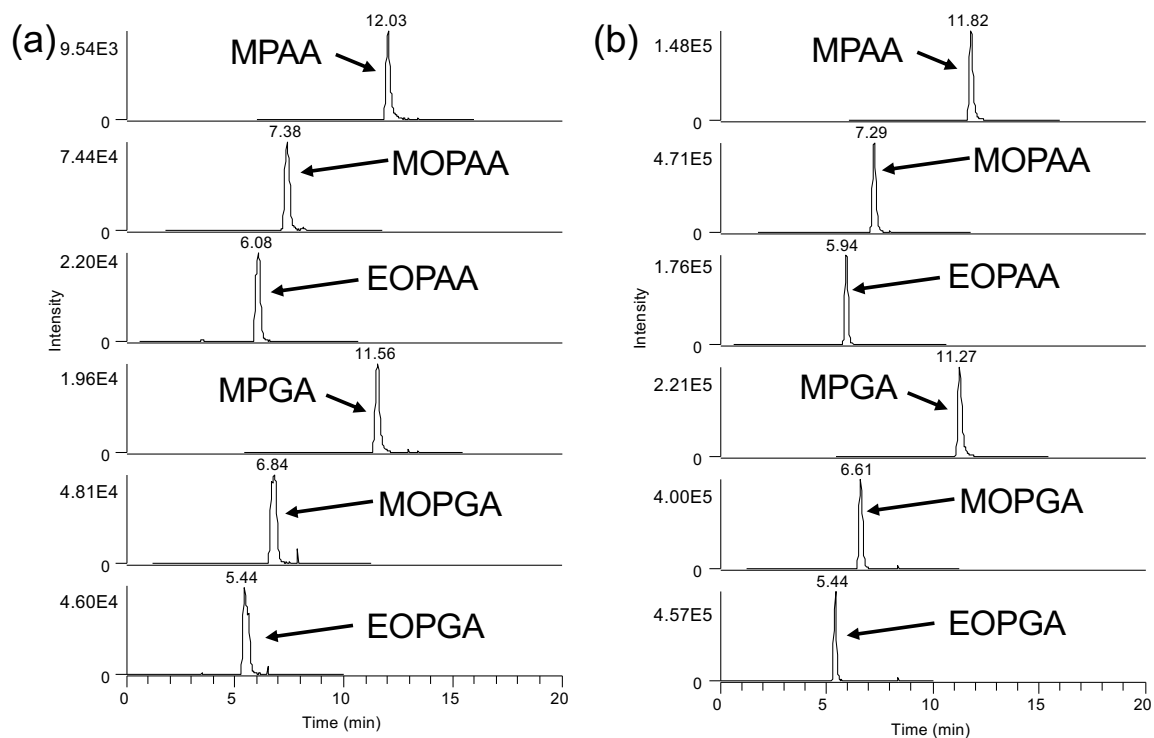

Fig. S1. EIC of urine sample analysis. (a) After dilution with water (10 times) and ultrafiltration, (b) after dilution with MeCN (10 times) and microfiltration.

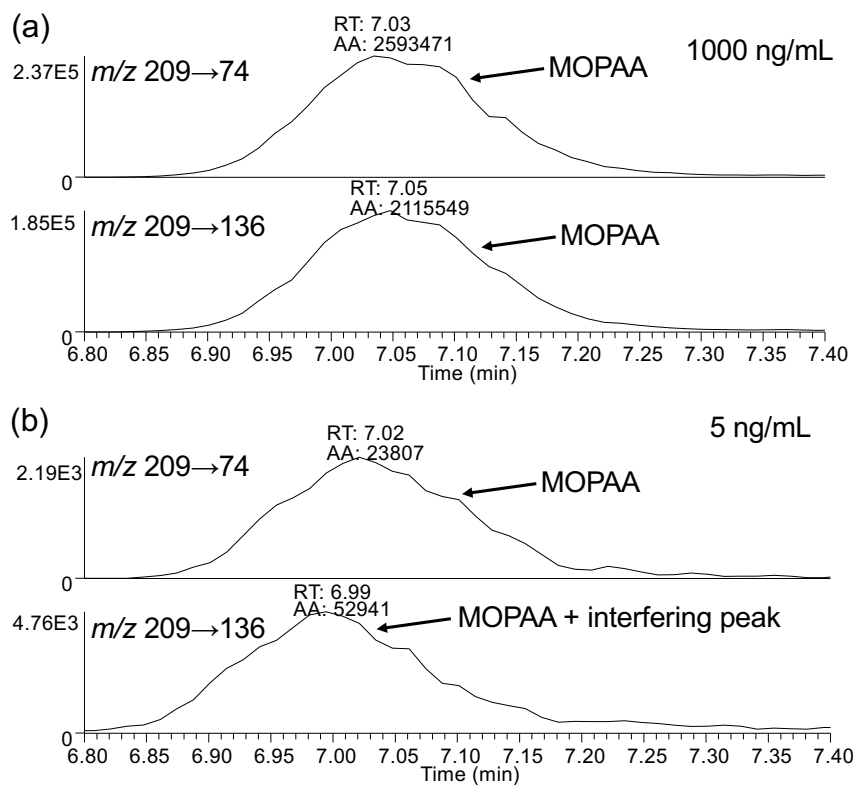

Fig. S2. EIC of urine sample after 10-fold dilution and microfiltration. (a) Urine with 1000 ng/mL of MOPAA, (b) urine with 5 ng/mL of MOPAA.

Table S3. Peak area errors calculated with constructed calibration curves for urine samples (%)

| Concentration<br>(ng/mL) | MOPAA | EOPAA | MPAA  | MOPGA | EOPGA | MPGA  |
|--------------------------|-------|-------|-------|-------|-------|-------|
| 1000                     | -7.7  | -7.8  | -7.3  | -5.6  | -6.3  | -6.5  |
| 500                      | +20.9 | +20.4 | +16   | +18.6 | +19.5 | +15.6 |
| 250                      | -10.1 | -11.6 | -5.9  | -15.5 | -14.8 | -7.7  |
| 100                      | -1.8  | +3.9  | +4.7  | +1.6  | +2.8  | +5.6  |
| 50                       | -1.4  | +14.1 | +14.3 | +10.5 | +8.7  | +10.3 |
| 25                       | -     | -25.9 | -15.2 | -23.7 | -26.1 | -15.7 |
| 10                       | -     | +2.1  | +5.0  | +5.1  | +7.3  | -1.5  |
| 5                        | -     | +4.7  | -11.5 | +9.0  | +8.8  | -     |

Three samples were prepared for each concentration ( $n = 3$ ).

### 3. Validation of the developed methods

#### 3-1. Matrix effects

Table S4. Matrix effects of urine samples (%), average  $\pm$  standard deviation,  $n = 3$ 

| Concentration<br>(ng/mL) | MOPAA         | EOPAA        | MPAA          | MOPGA        | EOPGA         | MPGA          |
|--------------------------|---------------|--------------|---------------|--------------|---------------|---------------|
| 1000                     | 151 $\pm$ 12  | 74 $\pm$ 7.4 | 127 $\pm$ 7.7 | 71 $\pm$ 8.6 | 93 $\pm$ 12   | 134 $\pm$ 8.0 |
| 500                      | 142 $\pm$ 20  | 87 $\pm$ 3.1 | 161 $\pm$ 6.7 | 92 $\pm$ 1.5 | 110 $\pm$ 2.8 | 159 $\pm$ 6.7 |
| 50                       | 105 $\pm$ 8.9 | 72 $\pm$ 1.7 | 150 $\pm$ 6.2 | 79 $\pm$ 3.1 | 100 $\pm$ 4.4 | 150 $\pm$ 6.6 |

### 4. Computational details for the calculation of physicochemical parameters

#### 4-1. Calculation of $pK_a$

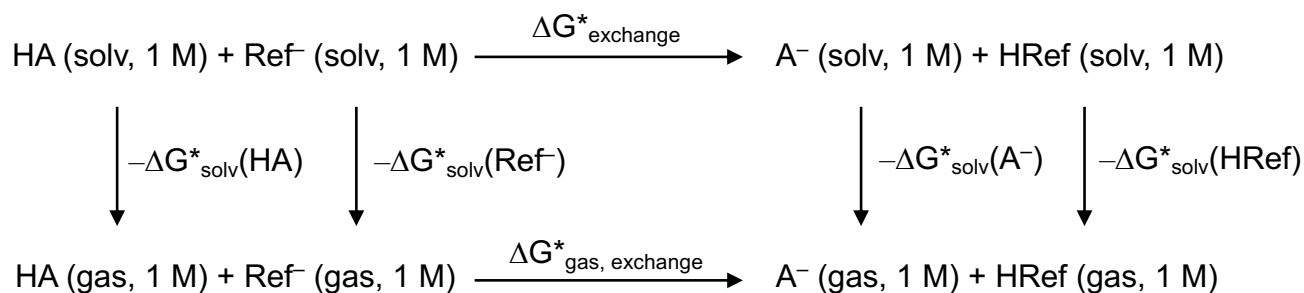

$$\begin{aligned}
 \Delta G^*_{\text{exchange}} = & \Delta G^*_{\text{gas, exchange}} + \Delta G^*_{\text{solv}}(\text{A}^-) + \Delta G^*_{\text{solv}}(\text{HRef}) \\
 & - \Delta G^*_{\text{solv}}(\text{HA}) - \Delta G^*_{\text{solv}}(\text{Ref}^-)
 \end{aligned}$$

$$\text{p}K_a = \Delta G^*_{\text{exchange}} / RT \ln(10) + \text{p}K_a(\text{HRef})$$

Equation S1. Calculation of  $\text{p}K_a$

## 4-2. Cartesian coordinates and energies

### 4-2-1. MOPAA

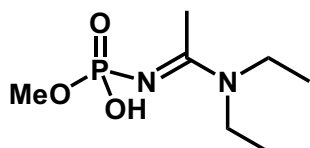

#### MOPAA

Gibbs Free Energy (M062X/6-311++G\*\*) = -953.278365 (A. U.)

Gibbs Free Energy (SMD (H<sub>2</sub>O)/M062X/6-311++G\*\*) = -953.304426 (A. U.)

|   |             |             |             |
|---|-------------|-------------|-------------|
| P | -1.59187900 | -0.31161100 | 0.38102600  |
| O | -1.43826100 | 0.66668600  | 1.50328700  |
| N | -0.31718600 | -1.18586800 | -0.12103400 |
| C | 0.95626400  | -1.03791000 | -0.32657600 |
| C | 1.74050600  | -2.33652300 | -0.45642000 |
| H | 2.17158100  | -2.43886200 | -1.45884500 |
| H | 2.55709300  | -2.40685900 | 0.26728700  |
| H | 1.04725800  | -3.15795900 | -0.28682200 |
| N | 1.65612800  | 0.12353900  | -0.48273800 |
| C | 1.00646400  | 1.43524200  | -0.66788800 |
| H | 1.46119800  | 1.88205700  | -1.56201300 |
| H | -0.04106100 | 1.26702500  | -0.90897100 |
| C | 1.13131300  | 2.39576800  | 0.51694900  |
| H | 2.17480900  | 2.65131400  | 0.72757000  |
| H | 0.60633800  | 3.32677000  | 0.27641300  |
| H | 0.66409700  | 1.96932600  | 1.40724800  |
| C | 3.12953100  | 0.13035700  | -0.55379900 |

|   |             |             |             |
|---|-------------|-------------|-------------|
| H | 3.47182300  | -0.70748600 | -1.16642400 |
| H | 3.41200000  | 1.03893200  | -1.09367200 |
| C | 3.83650200  | 0.10740100  | 0.80819800  |
| H | 3.55836200  | 0.97079900  | 1.41702300  |
| H | 3.59144400  | -0.79400400 | 1.37718000  |
| H | 4.92206000  | 0.12715800  | 0.65962800  |
| O | -2.19336700 | 0.30031000  | -1.00146900 |
| C | -3.46365100 | 0.97568700  | -0.97529600 |
| H | -3.61733600 | 1.37715200  | -1.97831600 |
| H | -4.26353900 | 0.26890300  | -0.73454900 |
| H | -3.45396400 | 1.79139600  | -0.24555400 |
| O | -2.72441800 | -1.43024300 | 0.75386000  |
| H | -2.92977600 | -1.36934000 | 1.69740200  |

#### MOPAA-H

Gibbs Free Energy (M062X/6-311++G\*\*) = -952.737933 (A. U.)

Gibbs Free Energy (SMD (H<sub>2</sub>O)/M062X/6-311++G\*\*) = -952.853648 (A. U.)

|   |             |             |             |
|---|-------------|-------------|-------------|
| P | -1.65062800 | -0.37228500 | 0.53329400  |
| O | -1.14155200 | 0.65530000  | 1.52511400  |
| N | -0.35377100 | -1.28931400 | -0.11080000 |
| C | 0.88284700  | -1.08745300 | -0.36374300 |
| C | 1.72272000  | -2.34872300 | -0.60151700 |
| H | 2.17287100  | -2.35970400 | -1.60321200 |
| H | 2.53403500  | -2.46280800 | 0.12725200  |

|   |             |             |             |
|---|-------------|-------------|-------------|
| H | 1.04747800  | -3.19753500 | -0.50447600 |
| N | 1.58597600  | 0.11547000  | -0.50101400 |
| C | 0.92941300  | 1.40224300  | -0.76410600 |
| H | 1.34926800  | 1.79023400  | -1.70945500 |
| H | -0.12933000 | 1.22026200  | -0.93471600 |
| C | 1.09123300  | 2.45317300  | 0.33839800  |
| H | 2.14369600  | 2.71166500  | 0.51588700  |
| H | 0.57277300  | 3.37230500  | 0.03602900  |
| H | 0.62190900  | 2.08241300  | 1.25339500  |
| C | 3.04664600  | 0.14792100  | -0.48203500 |
| H | 3.45974500  | -0.66915000 | -1.08473000 |
| H | 3.35489000  | 1.07522300  | -0.98001600 |
| C | 3.67162800  | 0.10593200  | 0.92318700  |
| H | 3.32225300  | 0.94394500  | 1.53200200  |
| H | 3.40212000  | -0.81582400 | 1.44817900  |
| H | 4.76719300  | 0.15305000  | 0.85488800  |
| O | -2.11323300 | 0.43220800  | -0.89634500 |
| C | -3.47218700 | 0.82141800  | -1.00099800 |
| H | -3.63595300 | 1.17433300  | -2.02751400 |
| H | -4.13846000 | -0.02343700 | -0.78812300 |
| H | -3.71317700 | 1.64023400  | -0.30563200 |
| O | -2.77410500 | -1.31264400 | 0.89103300  |

|   |             |             |             |
|---|-------------|-------------|-------------|
| H | -0.00309500 | -1.32318900 | -0.43832100 |
| C | -1.23697300 | -2.21777500 | 1.09711100  |
| H | -2.26953200 | -2.54460100 | 1.25727000  |
| H | -0.59787800 | -3.10580500 | 1.15389500  |
| H | -0.93263800 | -1.53566200 | 1.89385300  |
| C | -3.28761200 | -0.54034700 | -0.70159000 |
| H | -3.62844600 | 0.07426000  | -1.53864000 |
| H | -3.41108400 | -1.58074600 | -1.01647100 |
| C | -4.16036900 | -0.27567600 | 0.53276500  |
| H | -3.87947200 | -0.92340300 | 1.36646300  |
| H | -4.07727300 | 0.76034400  | 0.87352300  |
| H | -5.21142900 | -0.46654900 | 0.28826600  |
| O | 2.05111200  | -0.13357500 | -0.55456000 |
| C | 3.37794400  | -0.61871900 | -0.23625600 |
| H | 4.02940800  | 0.24319300  | -0.05458700 |
| H | 3.32788100  | -1.21961900 | 0.67883300  |
| C | 3.87280400  | -1.44124200 | -1.41228000 |
| H | 4.88282100  | -1.81248800 | -1.20671800 |
| H | 3.21916500  | -2.30072000 | -1.59073400 |
| H | 3.90470600  | -0.83521400 | -2.32277600 |
| O | 2.16091700  | 2.01154700  | 0.76803000  |
| H | 2.23534500  | 2.20022700  | 1.71404300  |

#### 4-2-2. EOPAA

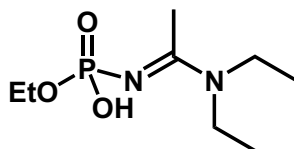

#### EOPAA

Gibbs Free Energy (M062X/6-311++G\*\*) = -992.560324 (A. U.)

Gibbs Free Energy (SMD (H<sub>2</sub>O)/M062X/6-311++G\*\*) = -992.587481 (A. U.)

|   |             |             |             |
|---|-------------|-------------|-------------|
| P | 1.20951900  | 0.69767000  | 0.56030900  |
| O | 0.99965400  | -0.00242300 | 1.86672800  |
| N | -0.06641100 | 1.26078000  | -0.27713100 |
| C | -1.28245000 | 0.90975800  | -0.56539000 |
| C | -2.16426300 | 2.02949900  | -1.10126900 |
| H | -2.47244200 | 1.83000800  | -2.13393500 |
| H | -3.06912600 | 2.17205800  | -0.50419600 |
| H | -1.57987100 | 2.94720000  | -1.08007600 |
| N | -1.84277700 | -0.33314600 | -0.48948600 |
| C | -1.05201500 | -1.55926900 | -0.27187300 |
| H | -1.34135700 | -2.25953500 | -1.06690700 |

#### EOPAA-H

Gibbs Free Energy (M062X/6-311++G\*\*) = -992.019645 (A. U.)

Gibbs Free Energy (SMD (H<sub>2</sub>O)/M062X/6-311++G\*\*) = -992.134561 (A. U.)

|   |             |             |             |
|---|-------------|-------------|-------------|
| P | 1.23896200  | 0.73478600  | 0.76375000  |
| O | 0.66096400  | -0.09067700 | 1.89573700  |
| N | -0.00880800 | 1.34290700  | -0.24217100 |
| C | -1.17776500 | 0.96379800  | -0.59408300 |
| C | -2.05731100 | 2.04432400  | -1.23550500 |
| H | -2.35325500 | 1.77872700  | -2.25924500 |
| H | -2.97385200 | 2.23975900  | -0.66621900 |
| H | -1.46383200 | 2.95700900  | -1.26106700 |
| N | -1.76880500 | -0.30349400 | -0.52424700 |
| C | -0.99369900 | -1.54269800 | -0.38530100 |
| H | -1.24093500 | -2.17633500 | -1.25586200 |
| H | 0.06332600  | -1.29769800 | -0.45799800 |
| C | -1.24386000 | -2.32621900 | 0.90686000  |
| H | -2.29054000 | -2.64365200 | 1.00522700  |
| H | -0.62396800 | -3.23213900 | 0.90209500  |
| H | -0.94193600 | -1.71127500 | 1.75862800  |

|   |             |             |             |
|---|-------------|-------------|-------------|
| C | -3.21048000 | -0.47918700 | -0.68467400 |
| H | -3.58483000 | 0.13104100  | -1.51473100 |
| H | -3.37724800 | -1.52250400 | -0.97875300 |
| C | -4.03779700 | -0.17906800 | 0.57717200  |
| H | -3.72519100 | -0.81433400 | 1.41004600  |
| H | -3.91307400 | 0.86133400  | 0.89324800  |
| H | -5.10532300 | -0.35229000 | 0.38356000  |
| O | 1.97111500  | -0.31916600 | -0.35968200 |
| C | 3.37508200  | -0.51468900 | -0.26836100 |
| H | 3.86980100  | 0.45186500  | -0.11143100 |
| H | 3.61282500  | -1.15392300 | 0.59782700  |
| C | 3.86284800  | -1.17776900 | -1.55243100 |
| H | 4.94579700  | -1.35544700 | -1.50692800 |
| H | 3.36139500  | -2.13997800 | -1.71040800 |
| H | 3.65061500  | -0.53865700 | -2.41689300 |
| O | 2.22379500  | 1.84607900  | 1.02838400  |

4-2-3. MPAA

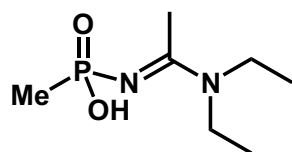

MPAA

Gibbs Free Energy (M062X/6-311++G\*\*) = -878.050002 (A. U.)

Gibbs Free Energy (SMD (H<sub>2</sub>O)/M062X/6-311++G\*\*) = -878.075696 (A. U.)

|   |             |             |             |
|---|-------------|-------------|-------------|
| P | 1.96238900  | 0.02853200  | 0.03486100  |
| O | 2.20748400  | 0.98717600  | 1.16679100  |
| N | 0.70150100  | -1.02107800 | 0.08170400  |
| C | -0.59101500 | -1.05549400 | 0.20825700  |
| C | -1.20795200 | -2.44409500 | 0.09401500  |
| H | -1.65988100 | -2.75120400 | 1.04433000  |
| H | -1.98061700 | -2.50192100 | -0.67710700 |
| H | -0.40955100 | -3.14054000 | -0.15383900 |
| N | -1.44893500 | -0.02369700 | 0.46084900  |
| C | -0.98775300 | 1.32986100  | 0.82280700  |
| H | -1.55586900 | 1.62814800  | 1.71302800  |
| H | 0.05658700  | 1.27542500  | 1.12866900  |
| C | -1.16240600 | 2.38121900  | -0.27792300 |
| H | -2.21543600 | 2.57162900  | -0.50876700 |
| H | -0.72238200 | 3.32629900  | 0.05883200  |
| H | -0.65147100 | 2.07268400  | -1.19416300 |
| C | -2.91151800 | -0.21585800 | 0.44373200  |

|   |             |             |             |
|---|-------------|-------------|-------------|
| H | -3.16190000 | -1.16917900 | 0.91533100  |
| H | -3.33580300 | 0.56203300  | 1.08540200  |
| C | -3.55748300 | -0.13553200 | -0.94655200 |
| H | -3.38570900 | 0.83753200  | -1.41259700 |
| H | -3.16563600 | -0.90196700 | -1.62141600 |
| H | -4.63941400 | -0.28589100 | -0.85832700 |
| C | 3.38447600  | -1.05256000 | -0.28640300 |
| H | 4.28017600  | -0.43968000 | -0.41788100 |
| H | 3.52817000  | -1.71377400 | 0.57210800  |
| H | 3.21150600  | -1.65461700 | -1.18127500 |
| O | 1.75143900  | 0.83795500  | -1.39729600 |
| H | 2.13397800  | 1.72417000  | -1.31666400 |

MPAA-H

Gibbs Free Energy (M062X/6-311++G\*\*) = -877.509965 (A. U.)

Gibbs Free Energy (SMD (H<sub>2</sub>O)/M062X/6-311++G\*\*) = -877.622982 (A. U.)

|   |             |             |             |
|---|-------------|-------------|-------------|
| P | 1.91431400  | 0.12947600  | -0.10371900 |
| O | 2.21775400  | 0.83851900  | 1.21258200  |
| N | 0.71885000  | -1.10446100 | 0.16568200  |
| C | -0.55071500 | -1.10183500 | 0.31026900  |
| C | -1.23332600 | -2.47406300 | 0.33845800  |
| H | -1.78310100 | -2.63943200 | 1.27496400  |
| H | -1.94001200 | -2.61589000 | -0.48842900 |
| H | -0.44608900 | -3.22211600 | 0.25150800  |
| N | -1.41719800 | -0.01464900 | 0.49391400  |
| C | -0.94643900 | 1.30720800  | 0.93108600  |
| H | -1.54963100 | 1.58632000  | 1.81230200  |
| H | 0.08883700  | 1.21093600  | 1.26811500  |
| C | -1.03186400 | 2.41533300  | -0.12484600 |
| H | -2.06344100 | 2.59515400  | -0.45724500 |
| H | -0.65432200 | 3.35032400  | 0.30851800  |
| H | -0.39332500 | 2.15523700  | -0.97496700 |
| C | -2.85328800 | -0.14297400 | 0.27093900  |
| H | -3.23588500 | -1.06087400 | 0.73423200  |
| H | -3.33659300 | 0.68667800  | 0.80122200  |
| C | -3.28625600 | -0.10868600 | -1.20604700 |
| H | -2.97172200 | 0.82231000  | -1.68484000 |
| H | -2.83809700 | -0.93428200 | -1.76806100 |
| H | -4.37902600 | -0.19407600 | -1.28567000 |
| C | 3.34695000  | -0.96149600 | -0.51092200 |
| H | 4.21319900  | -0.32198500 | -0.71203500 |
| H | 3.57566600  | -1.62209600 | 0.33137600  |

|   |            |             |             |
|---|------------|-------------|-------------|
| H | 3.13076600 | -1.56256900 | -1.39995000 |
| O | 1.54301300 | 0.91861500  | -1.35333900 |

4-2-4. MOPGA

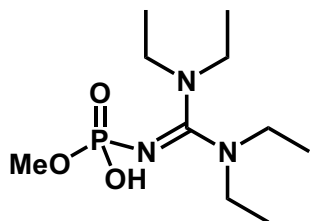

MOPGA

Gibbs Free Energy (M062X/6-311++G\*\*) = -1126.439834 (A. U.)

Gibbs Free Energy (SMD (H<sub>2</sub>O)/M062X/6-311++G\*\*) = -1126.464965 (A. U.)

|   |             |             |             |
|---|-------------|-------------|-------------|
| P | -1.82200800 | -0.82097400 | 0.37408700  |
| O | -2.29653900 | 0.16115500  | 1.40082100  |
| H | -2.45849300 | -2.31095000 | 1.79037300  |
| O | -2.11701800 | -2.34936300 | 0.88579300  |
| O | -2.62912500 | -0.77347400 | -1.03797500 |
| C | -4.06135800 | -0.89195400 | -1.02630300 |
| H | -4.35742200 | -1.89412400 | -0.69975100 |
| H | -4.39138000 | -0.73105900 | -2.05406200 |
| H | -4.50858100 | -0.13870000 | -0.37006700 |
| N | -0.26884600 | -0.87034500 | -0.11085000 |
| C | 0.66993500  | 0.03706400  | -0.15027400 |
| N | 0.49974400  | 1.39804200  | -0.30274300 |
| N | 1.98643400  | -0.39117200 | -0.03900800 |
| C | -0.59227300 | 1.95392400  | -1.12104000 |
| C | 1.34998500  | 2.35981600  | 0.42177700  |
| C | 2.97961000  | 0.06754400  | -1.02770700 |
| C | 2.22388300  | -1.71114300 | 0.56680000  |
| H | -0.12477100 | 2.53287800  | -1.93287300 |
| H | -1.11323500 | 1.11672400  | -1.58724800 |
| C | -1.59509900 | 2.84471800  | -0.38015300 |
| H | 2.40667000  | 2.11140800  | 0.30324000  |
| H | 1.20506100  | 3.33235600  | -0.05931100 |
| C | 1.01860400  | 2.45113600  | 1.91575300  |
| H | 3.92944100  | 0.26974500  | -0.51867800 |
| H | 2.62719500  | 1.01362100  | -1.43851300 |
| C | 3.20249400  | -0.91330400 | -2.18772600 |
| H | 1.41032800  | -1.88605100 | 1.27063000  |
| H | 2.14520700  | -2.50585200 | -0.18690100 |
| C | 3.56946700  | -1.79105300 | 1.29105000  |

|   |             |             |             |
|---|-------------|-------------|-------------|
| H | -1.11956400 | 3.74397300  | 0.02581300  |
| H | -2.36269400 | 3.17652200  | -1.08861400 |
| H | -2.07875400 | 2.29720800  | 0.43191000  |
| H | -0.02691700 | 2.72159300  | 2.08013900  |
| H | 1.19655400  | 1.49049000  | 2.40870100  |
| H | 1.65748300  | 3.20270500  | 2.39429600  |
| H | 2.26015700  | -1.13620700 | -2.69835100 |
| H | 3.88882300  | -0.46446900 | -2.91417100 |
| H | 3.64298100  | -1.85848900 | -1.85772600 |
| H | 3.64804300  | -2.75777100 | 1.79920600  |
| H | 4.42402200  | -1.71144000 | 0.61105800  |
| H | 3.65860200  | -1.00220300 | 2.04562800  |

MOPGA-H

Gibbs Free Energy (M062X/6-311++G\*\*) = -1125.901087 (A. U.)

Gibbs Free Energy (SMD (H<sub>2</sub>O)/M062X/6-311++G\*\*) = -1126.009078 (A. U.)

|   |             |             |             |
|---|-------------|-------------|-------------|
| P | 1.85315200  | -0.83692100 | -0.61675000 |
| O | 2.06669300  | 0.40135800  | -1.46459200 |
| O | 2.26642900  | -2.20137800 | -1.11084200 |
| O | 2.59671100  | -0.59866900 | 0.89248300  |
| C | 3.90936000  | -1.10934400 | 1.05346400  |
| H | 3.96359700  | -2.15842400 | 0.73843100  |
| H | 4.64259200  | -0.53141300 | 0.47019000  |
| N | 0.22885100  | -0.93705100 | -0.06348400 |
| C | -0.67010700 | -0.04418600 | 0.09829800  |
| N | -0.53186500 | 1.32875200  | 0.34534400  |
| N | -2.04599700 | -0.43712000 | 0.05827700  |
| C | 0.56701900  | 1.85427700  | 1.16156500  |
| C | -1.39064700 | 2.29640400  | -0.33723100 |
| C | -2.83827600 | -0.14732700 | 1.25960900  |
| C | -2.34237200 | -1.71946500 | -0.58432600 |
| H | 0.11768600  | 2.36551100  | 2.03399500  |
| H | 1.13517900  | 1.00108200  | 1.53379900  |
| C | 1.53326000  | 2.81630700  | 0.45935800  |
| H | -2.44323900 | 2.00914000  | -0.24151300 |
| H | -1.27636600 | 3.25447100  | 0.18544400  |
| C | -1.06267900 | 2.46983300  | -1.82769700 |
| H | -3.89253800 | -0.33810800 | 1.02303400  |
| H | -2.75701800 | 0.91928400  | 1.48725300  |
| C | -2.43385900 | -0.94745900 | 2.51054400  |
| H | -1.48187800 | -1.96906900 | -1.20616200 |
| H | -2.41503900 | -2.53184700 | 0.15587500  |

|   |             |             |             |
|---|-------------|-------------|-------------|
| C | -3.62205600 | -1.66661400 | -1.42721600 |
| H | 1.03033700  | 3.73116100  | 0.11997300  |
| H | 2.31262700  | 3.11655200  | 1.17198900  |
| H | 1.99899500  | 2.30670100  | -0.38928800 |
| H | -0.01853000 | 2.75359600  | -1.97654700 |
| H | -1.21894700 | 1.52735400  | -2.36131600 |
| H | -1.71544200 | 3.23364600  | -2.27323900 |
| H | -1.39173500 | -0.74720600 | 2.77740500  |
| H | -3.06993100 | -0.66500600 | 3.35951200  |
| H | -2.53501700 | -2.02656300 | 2.35656600  |
| H | -3.79812300 | -2.63966400 | -1.90277500 |
| H | -4.51061600 | -1.42763500 | -0.82952700 |
| H | -3.53344000 | -0.91041100 | -2.21481200 |
| H | 4.16611700  | -1.02645200 | 2.11741400  |

#### 4-2-5. EOPGA

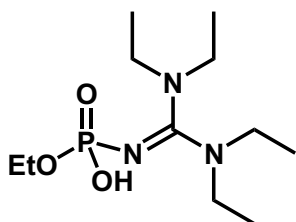

#### EOPGA

Gibbs Free Energy (M062X/6-311++G\*\*) = -1165.7215 (A. U.)

Gibbs Free Energy (SMD (H<sub>2</sub>O)/M062X/6-311++G\*\*) = -1165.746636 (A. U.)

|   |             |             |             |
|---|-------------|-------------|-------------|
| P | -1.54012000 | -0.63913600 | 0.76652500  |
| O | -1.82691200 | 0.45066100  | 1.75367600  |
| O | -1.83258200 | -2.09998800 | 1.44991900  |
| O | -2.52043700 | -0.66520700 | -0.52995200 |
| H | -2.05002100 | -1.96446800 | 2.38301300  |
| C | -3.95321700 | -0.70829000 | -0.33836400 |
| H | -4.21149200 | -1.64894500 | 0.16177300  |
| H | -4.25352200 | 0.12512600  | 0.30680400  |
| C | -4.61449500 | -0.61830500 | -1.70209400 |
| H | -4.29738900 | -1.44751200 | -2.34179100 |
| H | -5.70350200 | -0.66218500 | -1.59081400 |
| H | -4.35634000 | 0.32164600  | -2.19971100 |
| N | -0.06654600 | -0.81844900 | 0.09579600  |
| C | 0.90634900  | 0.02217600  | -0.13117600 |
| N | 0.79280900  | 1.37763500  | -0.36502300 |
| N | 2.20184100  | -0.48010100 | -0.15443000 |
| C | -0.36692100 | 1.94604000  | -1.07408800 |

|   |             |             |             |
|---|-------------|-------------|-------------|
| C | 1.78632000  | 2.32967100  | 0.16357100  |
| C | 3.07472900  | -0.16369300 | -1.30000900 |
| C | 2.44358900  | -1.76586900 | 0.51937700  |
| H | 0.01765500  | 2.43323000  | -1.98387700 |
| H | -0.99309600 | 1.11452100  | -1.39993600 |
| C | -1.20680300 | 2.95242600  | -0.28051800 |
| H | 2.80139200  | 2.00445900  | -0.07331900 |
| H | 1.63187600  | 3.27354200  | -0.36888200 |
| C | 1.66763600  | 2.54734100  | 1.67640100  |
| H | 4.09587600  | 0.00759200  | -0.93934100 |
| H | 2.72615600  | 0.77308900  | -1.73485500 |
| C | 3.07745300  | -1.23774200 | -2.39727200 |
| H | 1.72515100  | -1.83385300 | 1.33617500  |
| H | 2.21738900  | -2.60627300 | -0.15028500 |
| C | 3.86861500  | -1.88390500 | 1.06425200  |
| H | -0.62873700 | 3.84268800  | -0.01062700 |
| H | -2.04161900 | 3.28701600  | -0.90698400 |
| H | -1.60850600 | 2.49585500  | 0.62683600  |
| H | 0.67185600  | 2.89928400  | 1.95549900  |
| H | 1.85525800  | 1.61345700  | 2.21506600  |
| H | 2.40837800  | 3.28522600  | 2.00636800  |
| H | 2.06237900  | -1.43006600 | -2.75929700 |
| H | 3.68325100  | -0.89098200 | -3.24168300 |
| H | 3.50172400  | -2.18556000 | -2.05378900 |
| H | 3.96017400  | -2.81394800 | 1.63486600  |
| H | 4.62542800  | -1.91253000 | 0.27340800  |
| H | 4.10527700  | -1.04979900 | 1.73349700  |

#### EOPGA-H

Gibbs Free Energy (M062X/6-311++G\*\*) = -1165.182892 (A. U.)

Gibbs Free Energy (SMD (H<sub>2</sub>O)/M062X/6-311++G\*\*) = -1165.292554 (A. U.)

|   |             |             |             |
|---|-------------|-------------|-------------|
| P | -1.55614900 | -0.48030300 | 1.08516100  |
| O | -1.53693900 | 0.88398800  | 1.74450200  |
| O | -1.99860500 | -1.70801200 | 1.84270900  |
| O | -2.49986100 | -0.38865400 | -0.32641500 |
| C | -3.85170100 | -0.81921800 | -0.24913100 |
| H | -3.90500900 | -1.76420000 | 0.30569000  |
| H | -4.45427900 | -0.07741500 | 0.30021100  |
| C | -4.39561300 | -0.98362500 | -1.66437300 |
| H | -3.81661000 | -1.73595300 | -2.21172500 |
| H | -5.44604200 | -1.30309600 | -1.63815100 |
| H | -4.33590500 | -0.03930100 | -2.21825200 |



|   |             |             |             |
|---|-------------|-------------|-------------|
| N | -0.04864600 | -0.83036800 | 0.33724700  |
| C | 0.89140300  | -0.06996500 | -0.07499300 |
| N | 0.83823900  | 1.26430100  | -0.50151500 |
| N | 2.21751700  | -0.60074900 | -0.16398200 |
| C | -0.31767600 | 1.78803200  | -1.23591700 |
| C | 1.86938200  | 2.21760700  | -0.09242000 |
| C | 2.84662600  | -0.55781200 | -1.48960100 |
| C | 2.49274100  | -1.81153900 | 0.61282400  |
| H | 0.04122600  | 2.11851200  | -2.22914100 |
| H | -1.00820300 | 0.95879900  | -1.39300700 |
| C | -1.07957000 | 2.94034100  | -0.56977000 |
| H | 2.86693800  | 1.80445900  | -0.27575400 |
| H | 1.76914300  | 3.09923000  | -0.73817600 |
| C | 1.77469400  | 2.63444600  | 1.38288500  |
| H | 3.90298700  | -0.82949200 | -1.37086400 |
| H | 2.82804700  | 0.47237200  | -1.85621500 |
| C | 2.19262100  | -1.46581400 | -2.54614400 |
| H | 1.71282500  | -1.88596200 | 1.37154000  |
| H | 2.38822900  | -2.71691200 | -0.00571500 |
| C | 3.88060300  | -1.78302200 | 1.26385100  |
| H | -0.45184600 | 3.83220800  | -0.44530500 |
| H | -1.92464200 | 3.22231700  | -1.21143100 |
| H | -1.45981900 | 2.60969000  | 0.40113400  |
| H | 0.79281000  | 3.05084600  | 1.61818600  |
| H | 1.91892800  | 1.76495100  | 2.03141900  |
| H | 2.55122900  | 3.37590600  | 1.61791300  |
| H | 1.14527000  | -1.18851600 | -2.69940100 |
| H | 2.72060500  | -1.36943100 | -3.50375600 |
| H | 2.21678200  | -2.51977500 | -2.25125700 |
| H | 4.04020800  | -2.69883200 | 1.84677300  |
| H | 4.69040900  | -1.71768800 | 0.52640500  |
| H | 3.97136700  | -0.92562300 | 1.93956700  |

|   |             |             |             |
|---|-------------|-------------|-------------|
| P | -2.00953400 | -1.15003100 | -0.07564000 |
| O | -2.98941000 | -0.47797900 | -0.99498800 |
| N | -0.38722900 | -0.96616200 | -0.28991100 |
| C | 0.43003600  | 0.04629900  | -0.18156700 |
| N | 0.11201400  | 1.38822000  | -0.26073400 |
| C | -0.92345300 | 1.88587400  | -1.18456800 |
| H | -0.42043300 | 2.53901000  | -1.91497700 |
| H | -1.33332000 | 1.03258200  | -1.72342600 |
| C | -2.07359700 | 2.65718700  | -0.53403900 |
| H | -1.73188400 | 3.56318800  | -0.02226600 |
| H | -2.77979100 | 2.96027100  | -1.31372500 |
| H | -2.61566000 | 2.02783900  | 0.17432100  |
| C | 0.80034600  | 2.38888900  | 0.57383200  |
| H | 1.87780100  | 2.21647600  | 0.57769100  |
| H | 0.64217900  | 3.36282400  | 0.09897400  |
| C | 0.29702100  | 2.41594800  | 2.02204200  |
| H | -0.77079900 | 2.64262100  | 2.07348300  |
| H | 0.45857000  | 1.44694400  | 2.50388400  |
| H | 0.84186600  | 3.17728800  | 2.59269100  |
| O | -2.26310500 | -0.69557600 | 1.50009200  |
| H | -3.14659000 | -0.30764400 | 1.58015100  |
| N | 1.77671100  | -0.23041700 | 0.04112500  |
| C | 2.78293900  | 0.37905000  | -0.84854700 |
| H | 3.67246300  | 0.63771500  | -0.26222100 |
| H | 2.36858500  | 1.31244400  | -1.23033200 |
| C | 3.17737300  | -0.50260400 | -2.04216800 |
| H | 2.29787300  | -0.77778800 | -2.63303100 |
| H | 3.86641500  | 0.05043200  | -2.68995000 |
| H | 3.68162100  | -1.42278900 | -1.73292900 |
| C | 2.11437300  | -1.54486500 | 0.60741100  |
| H | 1.28168000  | -1.83252700 | 1.24968100  |
| H | 2.17047600  | -2.30964600 | -0.17932100 |
| C | 3.41143700  | -1.51932000 | 1.41922100  |
| H | 3.55581300  | -2.49290200 | 1.89914500  |
| H | 4.29551300  | -1.32763800 | 0.80236800  |
| H | 3.36991700  | -0.75643400 | 2.20398600  |
| C | -2.21038200 | -2.95473700 | -0.04197900 |
| H | -1.56929800 | -3.40079200 | 0.72199100  |
| H | -3.25638900 | -3.19406100 | 0.16696700  |
| H | -1.94050500 | -3.36032600 | -1.02056900 |

#### 4-2-6. MPGA

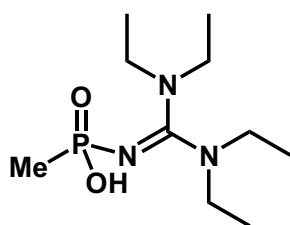

#### MPGA

Gibbs Free Energy (M062X/6-311++G\*\*) = -1051.210675 (A. U.)

Gibbs Free Energy (SMD (H<sub>2</sub>O)/M062X/6-311++G\*\*) = -1051.23349 (A. U.)

S-9

#### MPGA-H

Gibbs Free Energy (M062X/6-311++G\*\*) = -1050.672373 (A. U.)

Gibbs Free Energy (SMD (H<sub>2</sub>O)/M062X/6-311++G\*\*) = -1050.781339 (A. U.)

|   |             |             |             |
|---|-------------|-------------|-------------|
| P | -2.08069400 | -1.09239900 | 0.09121000  |
| O | -2.70487300 | -0.93627800 | -1.29052100 |
| N | -0.35039900 | -0.96577700 | -0.06070500 |
| C | 0.42565800  | 0.04442500  | -0.11355800 |
| N | 0.12454400  | 1.39312700  | -0.35004200 |
| C | -1.03731100 | 1.79443200  | -1.15351200 |
| H | -0.66628900 | 2.43888100  | -1.97110800 |
| H | -1.46343200 | 0.89343100  | -1.60203600 |
| C | -2.14963700 | 2.52693900  | -0.39199600 |
| H | -1.80419200 | 3.47883600  | 0.03344100  |
| H | -2.96609200 | 2.75167500  | -1.08967500 |
| H | -2.54075900 | 1.88166800  | 0.40102000  |
| C | 0.84103700  | 2.45049400  | 0.36327400  |
| H | 1.92371700  | 2.34337900  | 0.23184100  |
| H | 0.55939400  | 3.39882600  | -0.11017400 |
| C | 0.53229400  | 2.51070700  | 1.86671800  |
| H | -0.53849400 | 2.63366200  | 2.04754100  |
| H | 0.84546100  | 1.58231100  | 2.35400000  |
| H | 1.07410400  | 3.34509900  | 2.33395500  |
| O | -2.55061600 | -0.24784000 | 1.26897400  |
| N | 1.84096600  | -0.15222100 | 0.07402000  |
| C | 2.66640200  | 0.17019300  | -1.09909400 |
| H | 3.70639600  | 0.30178200  | -0.77256800 |
| H | 2.33139700  | 1.13868600  | -1.47936500 |
| C | 2.60791500  | -0.85187800 | -2.24866600 |
| H | 1.57442200  | -1.01401000 | -2.56979800 |
| H | 3.18557800  | -0.48195600 | -3.10544400 |
| H | 3.02504300  | -1.82256000 | -1.95971700 |
| C | 2.20205500  | -1.38568700 | 0.77494900  |
| H | 1.44241800  | -1.54031600 | 1.54320700  |
| H | 2.13842800  | -2.26887500 | 0.12012800  |
| C | 3.58967600  | -1.31200000 | 1.42156700  |
| H | 3.76530200  | -2.21298000 | 2.02190300  |
| H | 4.39846500  | -1.25138300 | 0.68372500  |
| H | 3.66714400  | -0.43935900 | 2.08030400  |
| C | -2.18598500 | -2.87171800 | 0.57356700  |
| H | -1.66381600 | -3.04800500 | 1.51973800  |
| H | -3.24418400 | -3.12535200 | 0.69801000  |
| H | -1.75410000 | -3.50586500 | -0.20710200 |

4-2-7. CH<sub>3</sub>COOH (HRef for degradation products of Novichok agents)

S-10

CH<sub>3</sub>COOH

pK<sub>a</sub> (H<sub>2</sub>O) = 4.76 (Evans's pK<sub>a</sub> Table)

Gibbs Free Energy (M062X/6-311++G\*\*) = -229.028596 (A. U.)

Gibbs Free Energy (SMD (H<sub>2</sub>O)/M062X/6-311++G\*\*) = -229.040363 (A. U.)

|   |             |             |             |
|---|-------------|-------------|-------------|
| C | -1.39693800 | -0.12129800 | 0.00001100  |
| H | -1.67707800 | -0.70495200 | -0.88222100 |
| H | -1.67709500 | -0.70625100 | 0.88135400  |
| H | -1.92406500 | 0.83200200  | 0.00063500  |
| C | 0.08839700  | 0.12494900  | 0.00004100  |
| O | 0.63284300  | 1.20849300  | -0.00000400 |
| O | 0.79152500  | -1.03864400 | 0.00000600  |
| H | 1.73454100  | -0.80149000 | -0.00009600 |

CH<sub>3</sub>COOH-H

Gibbs Free Energy (M062X/6-311++G\*\*) = -228.47821 (A. U.)

Gibbs Free Energy (SMD (H<sub>2</sub>O)/M062X/6-311++G\*\*) = -228.593273 (A. U.)

|   |             |             |             |
|---|-------------|-------------|-------------|
| C | -1.35469800 | -0.02130600 | 0.00414900  |
| H | -1.74242600 | -0.98724700 | 0.34697800  |
| H | -1.75647700 | 0.78902600  | 0.62420400  |
| H | -1.70651300 | 0.14588700  | -1.02350500 |
| C | 0.20896400  | 0.00050300  | 0.00995700  |
| O | 0.73340200  | 1.14858500  | -0.00200800 |
| O | 0.77657600  | -1.12644100 | -0.00203100 |

4-2-8. MPA

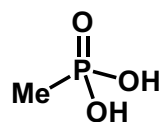

MPA

Gibbs Free Energy (M062X/6-311++G\*\*) = -608.139028 (A. U.)

Gibbs Free Energy (SMD (H<sub>2</sub>O)/M062X/6-311++G\*\*) = -608.177219 (A. U.)

|   |             |             |            |
|---|-------------|-------------|------------|
| P | -0.09987400 | 0.14460100  | 0.00057000 |
| O | -0.68621100 | 1.49867400  | 0.00579200 |
| O | -0.57051700 | -0.72610300 | 1.29930800 |

|   |             |             |             |
|---|-------------|-------------|-------------|
| C | 1.71686500  | 0.06846000  | -0.00096700 |
| H | 2.08800300  | 0.58164600  | 0.88975900  |
| H | 2.09527300  | -0.95921200 | -0.00470300 |
| H | 2.08663600  | 0.58754500  | -0.88883200 |
| O | -0.57233700 | -0.71655900 | -1.30381800 |
| H | -0.22303600 | -1.61469300 | -1.38357500 |
| H | -0.21743700 | -1.62316800 | 1.37433900  |

|   |             |             |             |
|---|-------------|-------------|-------------|
| C | 1.30775100  | 1.56318900  | -0.45755300 |
| H | 1.20821100  | 1.71526700  | -1.53527400 |
| H | 0.65274200  | 2.27111600  | 0.06052500  |
| H | 2.34544100  | 1.75067700  | -0.17004300 |
| O | 1.00621300  | -0.30918900 | 1.53510600  |
| H | 0.76927200  | 0.48023500  | 2.04076000  |
| H | -1.60517400 | 1.29130200  | 0.53717000  |

MPA-H

Gibbs Free Energy (M062X/6-311++G\*\*) = -607.62283 (A. U.)

Gibbs Free Energy (SMD (H<sub>2</sub>O)/M062X/6-311++G\*\*) = -607.738438 (A. U.)

|   |             |             |             |
|---|-------------|-------------|-------------|
| P | -0.09552300 | -0.15040500 | 0.09080200  |
| O | -0.15116900 | -1.57772800 | -0.40162600 |
| O | -0.80602100 | 0.85342800  | -1.08338300 |
| C | 1.65819100  | 0.42882000  | -0.01992000 |
| H | 2.04339200  | 0.27096800  | -1.03253800 |
| H | 1.73416300  | 1.48975000  | 0.24020200  |
| H | 2.26345100  | -0.15438100 | 0.68235500  |
| O | -0.68870300 | 0.30419100  | 1.41605500  |
| H | -1.39016000 | 1.43769400  | -0.58089500 |

EMPA-H

Gibbs Free Energy (M062X/6-311++G\*\*) = -686.16364 (A. U.)

Gibbs Free Energy (SMD (H<sub>2</sub>O)/M062X/6-311++G\*\*) = -686.274559 (A. U.)

|   |             |             |             |
|---|-------------|-------------|-------------|
| P | 0.91573400  | -0.21128800 | 0.06460500  |
| O | 1.64516700  | -1.21429600 | -0.79552900 |
| O | -0.67726200 | -0.16193200 | -0.53208700 |
| C | -1.70651600 | 0.36448000  | 0.28871900  |
| H | -1.54798400 | 0.05859900  | 1.33015000  |
| C | -3.05336700 | -0.13274800 | -0.22807500 |
| H | -3.09590200 | -1.22646600 | -0.18334100 |
| H | -3.87525300 | 0.27587000  | 0.37577200  |
| H | -3.20518500 | 0.16847600  | -1.27120200 |
| C | 1.48877800  | 1.48875600  | -0.39790500 |
| H | 1.45157700  | 1.61718200  | -1.48442200 |
| H | 0.87444700  | 2.25731600  | 0.08504700  |
| H | 2.52381800  | 1.60996600  | -0.06094500 |
| O | 0.83884500  | -0.29679900 | 1.57748900  |
| H | -1.68888300 | 1.46965400  | 0.26445000  |

4-2-9. EMPA

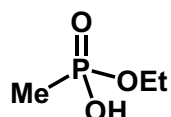

EMPA

Gibbs Free Energy (M062X/6-311++G\*\*) = -686.684063 (A. U.)

Gibbs Free Energy (SMD (H<sub>2</sub>O)/M062X/6-311++G\*\*) = -686.714202 (A. U.)

|   |             |             |             |
|---|-------------|-------------|-------------|
| P | 0.89200600  | -0.17041900 | -0.09238700 |
| O | 1.70763500  | -1.17590600 | -0.80469900 |
| O | -0.68886200 | -0.31937400 | -0.42452200 |
| C | -1.74491900 | 0.20883400  | 0.40301200  |
| H | -1.70207800 | -0.27443800 | 1.38573600  |
| C | -3.06943500 | -0.07353900 | -0.28289500 |
| H | -3.20420300 | -1.14966600 | -0.42261300 |
| H | -3.89417800 | 0.30594900  | 0.32982800  |
| H | -3.11039000 | 0.41068800  | -1.26274800 |

4-2-10. IMPA

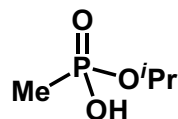

IMPA

Gibbs Free Energy (M062X/6-311++G\*\*) = -725.979407 (A. U.)

Gibbs Free Energy (SMD (H<sub>2</sub>O)/M062X/6-311++G\*\*) = -725.999311 (A. U.)

|   |             |             |             |
|---|-------------|-------------|-------------|
| P | 1.06073600  | -0.11142900 | 0.06845300  |
| O | 1.21912100  | -1.43276900 | 0.74162800  |
| O | -0.38225300 | 0.23022100  | -0.56114700 |
| C | -1.61338000 | 0.02937200  | 0.20996600  |

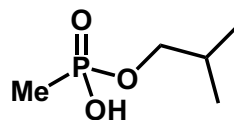

<sup>t</sup>BuMPA

Gibbs Free Energy (M062X/6-311++G\*\*) = -765.24055 (A. U.)

Gibbs Free Energy (SMD (H<sub>2</sub>O)/M062X/6-311++G\*\*) = -765.269633 (A. U.)

|   |             |             |             |
|---|-------------|-------------|-------------|
| P | 1.64208800  | -0.17005000 | -0.02020700 |
| O | 2.41317400  | -1.38324200 | -0.36353400 |
| O | 0.06627900  | -0.33044500 | -0.36607600 |
| C | -0.98099000 | 0.48196400  | 0.19824200  |
| H | -0.98027100 | 0.36256800  | 1.28987900  |
| C | -2.32449200 | 0.03751400  | -0.38076300 |
| H | -2.24875600 | 0.13195500  | -1.47276600 |
| C | 2.17723400  | 1.35104000  | -0.86312000 |
| H | 2.11928700  | 1.18032400  | -1.94111800 |
| H | 1.55420800  | 2.21443200  | -0.60831300 |
| H | 3.21574000  | 1.56094800  | -0.59482700 |
| O | 1.70434100  | 0.17580200  | 1.57842200  |
| H | 1.45510100  | 1.07794000  | 1.82195000  |
| H | -0.79931600 | 1.53931800  | -0.04350900 |
| C | -3.43282600 | 0.97907500  | 0.11484100  |
| H | -3.23764300 | 2.02190800  | -0.16152200 |
| H | -4.39790800 | 0.69622000  | -0.31727300 |
| H | -3.53507400 | 0.93164200  | 1.20626400  |
| C | -2.62646700 | -1.42760900 | -0.03892500 |
| H | -1.82886200 | -2.08712200 | -0.39019800 |
| H | -2.72689600 | -1.56253500 | 1.04563000  |
| H | -3.56602500 | -1.74567100 | -0.50324400 |

<sup>t</sup>BuMPA-H

Gibbs Free Energy (M062X/6-311++G\*\*) = -764.721624 (A. U.)

Gibbs Free Energy (SMD (H<sub>2</sub>O)/M062X/6-311++G\*\*) = -764.829766 (A. U.)

|   |             |             |             |
|---|-------------|-------------|-------------|
| P | -1.62910600 | 0.17694100  | 0.12039500  |
| O | -2.30442000 | 1.35820800  | -0.53285000 |
| O | -0.10305800 | 0.05166900  | -0.62353400 |
| C | 0.94883800  | -0.63294400 | 0.03226600  |
| H | 0.82917100  | -0.55036500 | 1.12159100  |
| C | 2.29966300  | -0.04765500 | -0.40428900 |
| H | 2.34148500  | -0.11450100 | -1.50202500 |

|   |             |             |             |
|---|-------------|-------------|-------------|
| H | -1.35361000 | 0.02904100  | 1.27522900  |
| C | -2.21567700 | -1.31700800 | -0.17154200 |
| H | -1.51788200 | -2.12752800 | 0.05333600  |
| H | -3.14070400 | -1.48690200 | 0.39048100  |
| H | -2.45197100 | -1.33906800 | -1.24074700 |
| C | -2.51529400 | 1.21698400  | -0.09476300 |
| H | -2.03058700 | 2.15498400  | 0.18979700  |
| H | -2.74761100 | 1.25530400  | -1.16421800 |
| H | -3.45521100 | 1.12730500  | 0.46020600  |
| C | 2.13729200  | 0.23165700  | -1.34067800 |
| H | 1.92577900  | -0.48596600 | -2.13673300 |
| H | 1.97181000  | 1.24699300  | -1.70754600 |
| H | 3.17646100  | 0.12015600  | -1.02208500 |
| O | 1.32649700  | 1.13051500  | 1.10743100  |
| H | 1.64792200  | 0.78734600  | 1.95429000  |

IMPA-H

Gibbs Free Energy (M062X/6-311++G\*\*) = -725.446948 (A. U.)

Gibbs Free Energy (SMD (H<sub>2</sub>O)/M062X/6-311++G\*\*) = -725.555401 (A. U.)

|   |             |             |             |
|---|-------------|-------------|-------------|
| P | 1.11253800  | 0.11754100  | -0.15119700 |
| O | 1.34271500  | 1.57047900  | 0.21720000  |
| O | -0.37760500 | -0.39132900 | 0.50640000  |
| C | -1.56545400 | -0.05649600 | -0.20758900 |
| H | -1.32832700 | -0.00339400 | -1.28009100 |
| C | -2.10251800 | 1.30305800  | 0.25709900  |
| H | -1.32737400 | 2.06441200  | 0.13473000  |
| H | -2.99227000 | 1.59259500  | -0.31982600 |
| H | -2.37469000 | 1.25975400  | 1.31969900  |
| C | -2.57315900 | -1.18598900 | 0.01521000  |
| H | -2.16526000 | -2.13381000 | -0.35078800 |
| H | -2.78928500 | -1.29561500 | 1.08563600  |
| H | -3.51581400 | -0.98208200 | -0.51006200 |
| C | 2.17121900  | -0.95983000 | 0.90498800  |
| H | 2.00456300  | -0.73606500 | 1.96326500  |
| H | 1.95899500  | -2.01576800 | 0.71243400  |
| H | 3.21759700  | -0.75243800 | 0.65844000  |
| O | 1.16529700  | -0.34979500 | -1.59406600 |

4-2-11. <sup>t</sup>BuMPA

|   |             |             |             |
|---|-------------|-------------|-------------|
| C | -2.42063300 | -1.37641700 | -0.50264000 |
| H | -2.47695400 | -1.35945900 | -1.59574000 |
| H | -1.86027500 | -2.26001500 | -0.17652100 |
| H | -3.43547200 | -1.43834800 | -0.09550000 |
| O | -1.42351700 | 0.04692200  | 1.61773100  |
| H | 0.92308700  | -1.70731300 | -0.22833400 |
| C | 3.45555500  | -0.87747200 | 0.17468700  |
| H | 3.39119800  | -1.92888200 | -0.13330200 |
| H | 4.42778600  | -0.48976000 | -0.15516400 |
| H | 3.44366400  | -0.85167700 | 1.27247400  |
| C | 2.41412500  | 1.43134200  | -0.01310300 |
| H | 1.56380500  | 1.99269900  | -0.40923400 |
| H | 2.40802000  | 1.54394100  | 1.07914100  |
| H | 3.34373600  | 1.87404700  | -0.39561100 |

|   |             |             |             |
|---|-------------|-------------|-------------|
| H | -0.71628900 | -2.07701300 | 0.03800000  |
| C | -3.57844700 | -0.06530200 | -0.05805700 |
| H | -3.44205100 | 2.10721400  | -0.13927300 |
| H | -2.73975600 | 1.39272600  | 1.30468500  |
| H | -3.23175700 | -2.20941500 | 0.10489900  |
| H | -2.60989400 | -1.27286900 | 1.45526500  |
| H | -4.54151100 | -0.08183800 | 0.46596700  |
| H | -3.80341000 | -0.13702800 | -1.13156400 |

CHMPA-H

Gibbs Free Energy (M062X/6-311++G\*\*) =

-842.100373 (A. U.)

Gibbs Free Energy (SMD (H<sub>2</sub>O)/M062X/6-311++G\*\*) = -842.209535 (A. U.)

4-2-12. CHMPA

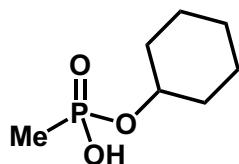

CHMPA

Gibbs Free Energy (M062X/6-311++G\*\*) =

-842.620243 (A. U.)

Gibbs Free Energy (SMD (H<sub>2</sub>O)/M062X/6-311++G\*\*) = -842.650227 (A. U.)

|   |             |             |             |
|---|-------------|-------------|-------------|
| P | 2.10577900  | -0.06553500 | -0.10918700 |
| O | 3.12839200  | -0.36100900 | -1.13482700 |
| O | 0.63036100  | 0.11978500  | -0.75016700 |
| C | 2.40793900  | 1.43606300  | 0.87387700  |
| H | 2.48428400  | 2.28274900  | 0.18700800  |
| H | 1.60609100  | 1.63490500  | 1.59222600  |
| H | 3.35517000  | 1.32767800  | 1.40815300  |
| O | 1.97405000  | -1.27454900 | 0.98827400  |
| H | 1.46935100  | -1.06123500 | 1.78528100  |
| C | -0.62004800 | 0.08152800  | -0.01765400 |
| C | -1.45845500 | 1.28714900  | -0.44255200 |
| C | -1.33603100 | -1.24029800 | -0.30174700 |
| H | -0.41640300 | 0.15851700  | 1.06337700  |
| C | -2.84768500 | 1.25846700  | 0.21815600  |
| H | -1.55924800 | 1.25972100  | -1.53515200 |
| H | -0.92622300 | 2.21292100  | -0.19504700 |
| C | -2.72429400 | -1.27232600 | 0.36098200  |
| H | -1.43534600 | -1.33951100 | -1.39029200 |

|   |             |             |             |
|---|-------------|-------------|-------------|
| P | 2.10305800  | -0.19960300 | 0.00270900  |
| O | 3.02250100  | -0.58874200 | -1.12884700 |
| O | 0.64552500  | 0.30162800  | -0.72408500 |
| C | 2.67604800  | 1.41682800  | 0.70052700  |
| H | 2.82010400  | 2.14526900  | -0.10366500 |
| H | 1.95401500  | 1.80836800  | 1.42598000  |
| H | 3.63166400  | 1.25674300  | 1.21118700  |
| O | 1.75157400  | -1.12374500 | 1.15451400  |
| C | -0.58020700 | 0.17124300  | -0.01688500 |
| C | -1.50059200 | 1.32925500  | -0.42638800 |
| C | -1.24106200 | -1.18403200 | -0.31090900 |
| H | -0.39336400 | 0.22319400  | 1.06701400  |
| C | -2.88570400 | 1.22180900  | 0.23448500  |
| H | -1.60591400 | 1.31346200  | -1.52089300 |
| H | -1.01940400 | 2.28127100  | -0.16982900 |
| C | -2.62341600 | -1.29984200 | 0.35300000  |
| H | -1.33725700 | -1.28677700 | -1.40189600 |
| H | -0.56632000 | -1.97160100 | 0.03722400  |
| C | -3.54603600 | -0.13768900 | -0.05098900 |
| H | -3.53528700 | 2.04017900  | -0.10684600 |
| H | -2.77865200 | 1.34372900  | 1.32316000  |
| H | -3.09005600 | -2.26120700 | 0.09727800  |
| H | -2.50053400 | -1.29699300 | 1.44655500  |
| H | -4.51063400 | -0.21008300 | 0.47172100  |
| H | -3.76522600 | -0.21006800 | -1.12731700 |

4-2-13. PMPA

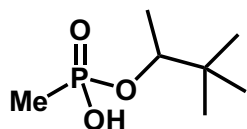

PMPA

Gibbs Free Energy (M062X/6-311++G\*\*) = -843.815638 (A. U.)

Gibbs Free Energy (SMD (H<sub>2</sub>O)/M062X/6-311++G\*\*) = -843.833795 (A. U.)

|   |             |             |             |
|---|-------------|-------------|-------------|
| P | -1.85440700 | 0.04100300  | 0.06939300  |
| O | -2.35140800 | 1.32121400  | 0.65145800  |
| O | -0.34826200 | 0.02142000  | -0.50059100 |
| C | 0.77272400  | 0.59474300  | 0.25491800  |
| C | 2.01486700  | -0.30021700 | -0.00684200 |
| C | -2.76119400 | -0.62911500 | -1.34210200 |
| H | -2.69305100 | 0.07060700  | -2.17822800 |
| H | -2.34773700 | -1.59600500 | -1.63741000 |
| H | -3.80919600 | -0.74983200 | -1.05758700 |
| O | -1.86795700 | -1.16949900 | 1.17574800  |
| H | -2.27999700 | -0.86051700 | 1.99611200  |
| H | 0.53146100  | 0.51891700  | 1.32318800  |
| C | 3.20950600  | 0.25946400  | 0.79475200  |
| H | 2.96613200  | 0.36473400  | 1.85914100  |
| H | 4.06139100  | -0.42473300 | 0.71775700  |
| H | 3.53698100  | 1.23499900  | 0.42263800  |
| C | 2.37228300  | -0.34609000 | -1.50555100 |
| H | 1.53067100  | -0.71225500 | -2.10082100 |
| H | 2.65960500  | 0.63852200  | -1.88871000 |
| H | 3.22027500  | -1.02110700 | -1.66622300 |
| C | 1.71607100  | -1.72979400 | 0.49043400  |
| H | 2.59403900  | -2.36989900 | 0.34963900  |
| H | 1.46464200  | -1.73502600 | 1.55749100  |
| H | 0.87834500  | -2.17504200 | -0.05189600 |
| C | 0.89214500  | 2.06772700  | -0.12665300 |
| H | 1.10191900  | 2.18410300  | -1.19375900 |
| H | -0.04700700 | 2.57812800  | 0.09957800  |
| H | 1.69022400  | 2.55397000  | 0.44153700  |

PMPA-H

Gibbs Free Energy (M062X/6-311++G\*\*) = -843.286618 (A. U.)

Gibbs Free Energy (SMD (H<sub>2</sub>O)/M062X/6-311++G\*\*) = -843.390756 (A. U.)

|   |             |             |             |
|---|-------------|-------------|-------------|
| P | 1.88456200  | -0.08799800 | -0.21464800 |
| O | 2.23874900  | 1.25629500  | -0.82277500 |
| O | 0.35843100  | 0.05756000  | 0.53404200  |
| C | -0.71977000 | 0.58027900  | -0.24147800 |
| C | -1.98497500 | -0.29586700 | 0.02176100  |
| C | 2.84179200  | -0.35382300 | 1.33771100  |
| H | 2.76439600  | 0.51975100  | 1.99195000  |
| H | 2.47948500  | -1.24272500 | 1.86337100  |
| H | 3.89120900  | -0.50612500 | 1.06543600  |
| O | 1.89292500  | -1.35835200 | -1.04051000 |
| H | -0.48517600 | 0.47944700  | -1.31205700 |
| C | -3.19328200 | 0.26575300  | -0.75550700 |
| H | -2.95705000 | 0.38620400  | -1.82058800 |
| H | -4.04650700 | -0.42117500 | -0.68024100 |
| H | -3.51619700 | 1.23911200  | -0.36951700 |
| C | -2.31929900 | -0.34672400 | 1.52541700  |
| H | -1.46176100 | -0.72158000 | 2.09127000  |
| H | -2.57943700 | 0.64342100  | 1.91835900  |
| H | -3.17540000 | -1.01107400 | 1.70460700  |
| C | -1.69345800 | -1.72454400 | -0.48064500 |
| H | -2.53788600 | -2.39175700 | -0.25853900 |
| H | -1.52697800 | -1.73155300 | -1.56420800 |
| H | -0.78628300 | -2.12070300 | -0.01857200 |
| C | -0.86510200 | 2.07666700  | 0.06399900  |
| H | -1.11339800 | 2.24421400  | 1.11868800  |
| H | 0.09916000  | 2.54695400  | -0.14577400 |
| H | -1.63288200 | 2.55308200  | -0.55807100 |

4-2-14. CH<sub>3</sub>COOH (HRef for degradation products of conventional nerve agents)

CH<sub>3</sub>COOH

pK<sub>a</sub> (H<sub>2</sub>O) = 4.76 (Evans's pK<sub>a</sub> Table)

Gibbs Free Energy (M062X/6-311++G\*\*) = -229.019171 (A. U.)

Gibbs Free Energy (SMD (H<sub>2</sub>O)/M062X/6-311++G\*\*) = -229.039201 (A. U.)

|   |             |             |             |
|---|-------------|-------------|-------------|
| C | -1.37054200 | -0.16083300 | -0.00001200 |
| H | -1.61717100 | -1.22612100 | -0.00004800 |
| H | -1.81654400 | 0.30755300  | -0.88157600 |
| H | -1.81665400 | 0.30751900  | 0.88151400  |
| C | 0.11981900  | 0.13558700  | 0.00009200  |
| O | 0.96226800  | -0.93653900 | -0.00001500 |
| H | 0.46708500  | -1.76723400 | -0.00003600 |

O 0.57368500 1.25275800 -0.00002700

---

CH<sub>3</sub>COOH-H

Gibbs Free Energy (M062X/6-311++G\*\*) )

= -228.478409 (A. U.)

Gibbs Free Energy (SMD (H<sub>2</sub>O)/M062X/6-311++G\*\*) = -

228.593406 (A. U.)

---

C -1.35396400 -0.04874400 -0.00000100

H -1.72733900 -1.07870800 -0.00005200

H -1.73878700 0.47959800 -0.88222600

H -1.73878300 0.47950600 0.88228200

C 0.20906300 0.00117500 0.00000100

O 0.80406200 -1.11135800 0.00000000

O 0.70522800 1.16198600 0.00000000

---
